# Supplementary material
Source: PubMed Central journal article supplement (PMC5289819)
Supplement: NIHMS784521-supplement-Acceptance.pdf [file NIHMS784521-supplement-Acceptance.pdf]

-----Original Message-----

From: onbehalfof+ajp+psych.org@manuscriptcentral.com

[mailto:onbehalfof+ajp+psych.org@manuscriptcentral.com] On Behalf Of ajp@psych.org

Sent: Tuesday, May 03, 2016 11:23 AM

To: Herbst, Ellen

Subject: [EXTERNAL] The American Journal of Psychiatry - Use of Stimulants and Performance Enhancers During and After Trauma Exposure in a Combat Veteran: A Risk Factor for Posttraumatic Stress Symptoms? - AJP-16-01-0014.R1

AJP-16-01-0014.R1 - Use of Stimulants and Performance Enhancers During and After Trauma Exposure in a Combat Veteran: A Risk Factor for Posttraumatic Stress Symptoms?

Dear Dr. Herbst:

I am happy to inform you that your paper has been accepted for publication in The American Journal of Psychiatry, with the understanding that Editor's revisions are sometimes made for issues detected after acceptance, and editorial staff will be making revisions in the interest of conciseness, clarity, and conformity with the Journal's style. We also expect you to inform us of any new findings that would alter the conclusions of this article prior to publication. This extends to any post-acceptance reviews by an institutional review board or other entity on a study's research integrity.

Upon acceptance, each author is sent an email that includes a link to the Author Center in ScholarOne Manuscripts. In order to begin production of your article, we ask that all authors use the link to locate, complete, and submit the Disclosure-Authorship forms within their Author Centers. The completion and submission counts as an electronic signature.

It is the responsibility of the corresponding author to make sure that each author signs and submits his/her own forms. Please submit them within 7 days.

The journal encourages use of video abstracts and other brief video material relevant to published studies. For an example, please follow this link and click on the full-text tab to view the video on the right: <http://ajp.psychiatryonline.org/article.aspx?articleid=1853440>. If you are interested in preparing and providing to us a video enhancement of your published study, please contact the AJP Editorial Staff at [ajp@psych.org](mailto:ajp@psych.org) to receive brief instructions on preparation and submission.

You will soon be receiving the edited manuscript for your review and approval. If you change your address or plan to be away from your office for 2 weeks or more over the next couple months, please notify our office as soon as possible.

Congratulations and thank you for your contribution to the Journal.

Yours sincerely,

Dr. Susan Schultz

Deputy Editor, The American Journal of Psychiatry
